# Supplementary material for: The COVID-19 Pandemic and Patient Safety Culture: A Cross-Sectional Study among Community Pharmacies in Jordan
Source: MDPI journal article supplement (doi:10.3390/healthcare10081434), 2022-07-30
Supplement: s1 [file s1]

**Table S1.** Patient Safety Culture Composites and Definitions

| <b>Composite</b>                                | <b>Definition: The extent to which...</b>                                                                                                                        |
|-------------------------------------------------|------------------------------------------------------------------------------------------------------------------------------------------------------------------|
| Communication About Mistakes                    | Staff discuss mistakes that happen and talk about ways to prevent mistakes                                                                                       |
| Communication About Prescriptions Across Shifts | Information about prescriptions is communicated well across shifts, and there are clear expectations and procedures for doing so                                 |
| Communication Openness                          | Staff freely speak up about patient safety concerns and feel comfortable asking questions; staff suggestions are valued                                          |
| Organizational Learning—Continuous Improvement  | The pharmacy tries to figure out what problems in the work process lead to mistakes and makes changes to keep mistakes from happening again                      |
| Overall Perceptions of Patient Safety           | There is a strong focus and emphasis on patient safety, and the pharmacy is good at preventing mistakes                                                          |
| Patient Counseling                              | Patients are encouraged to talk to the pharmacist; pharmacists spend enough time talking to patients and tell them important information about new prescriptions |
| Physical Space and Environment                  | The pharmacy is well organized and free of clutter; the pharmacy layout supports good workflow                                                                   |
| Response to Mistakes                            | The pharmacy examines why mistakes happen, helps staff learn from mistakes, and treats staff fairly when they make mistakes                                      |
| Staff Training and Skills                       | Staff get the training they need, new staff receive orientation, and staff have the skills they need to do their jobs well                                       |
| Staffing, Work Pressure, and Pace               | There are enough staff to handle the workload, staff do not feel rushed, staff can take breaks, and work can be completed accurately despite distractions        |
| Teamwork                                        | The staff treat each other with respect, work together as an effective team, and understand their roles and responsibilities                                     |

Source: The Community Pharmacy Survey On Patient Safety Culture (PSOPSC) users' guide [31].
