# Supplementary material for: The COVID-19 Pandemic and Patient Safety Culture: A Cross-Sectional Study among Community Pharmacies in Jordan
Source: MDPI journal article supplement (doi:10.3390/healthcare10081434), 2022-07-30
Supplement: s1 [file s1]

**Table S2.** PRR on patient safety culture items and dimensions according to pharmacy ownership type (N=378)

| SECTION A: Working in This Pharmacy                                                                                                           | Independent Pharmacy<br>N (%) | Chain Pharmacy<br>N (%) | P value                   |
|-----------------------------------------------------------------------------------------------------------------------------------------------|-------------------------------|-------------------------|---------------------------|
| <b>1. Physical Space and Environment</b>                                                                                                      |                               |                         |                           |
| A1 This pharmacy is well organized                                                                                                            | 257 (88.0)                    | 76 (88.4)               | 0.928 <sup>b</sup>        |
| A5 This pharmacy is free of clutter                                                                                                           | 221 (75.7)                    | 64 (74.4)               | 0.811 <sup>b</sup>        |
| A7 The physical layout of this pharmacy supports good workflow                                                                                | 241 (82.5)                    | 67 (77.9)               | 0.332 <sup>b</sup>        |
| <b>Dimension positivity</b>                                                                                                                   | 719 (82.1)                    | 207 (80.2)              | 0.896 <sup>a</sup>        |
| <b>2. Teamwork:</b>                                                                                                                           |                               |                         |                           |
| A2 Staff treat each other with respect                                                                                                        | 274 (93.8)                    | 81 (94.2)               | 0.905 <sup>a</sup>        |
| A4 Staff in this pharmacy clearly understand their roles and responsibilities                                                                 | 258 (88.4)                    | 77 (89.5)               | 0.762 <sup>a</sup>        |
| A9 Staff work together as an effective team                                                                                                   | 261 (89.4)                    | 71 (82.6)               | 0.089 <sup>a</sup>        |
| <b>Dimension positivity</b>                                                                                                                   | 793 (90.5)                    | 229 (88.8)              | <b>0.037 <sup>a</sup></b> |
| <b>3. Staff Training and Skills:</b>                                                                                                          |                               |                         |                           |
| A3 Technicians in this pharmacy receive the training they need to do their jobs                                                               | 232 (79.5)                    | 69 (80.2)               | 0.874 <sup>b</sup>        |
| A6 Staff in this pharmacy have the skills they need to do their jobs well                                                                     | 257 (88.0)                    | 66 (76.7)               | <b>0.009 <sup>a</sup></b> |
| A8 Staff who are new to this pharmacy receive adequate orientation                                                                            | 255 (87.3)                    | 65 (75.6)               | <b>0.008 <sup>a</sup></b> |
| A10 Staff get enough training from this pharmacy                                                                                              | 241 (82.5)                    | 66 (76.7)               | 0.227 <sup>b</sup>        |
| <b>Dimension positivity</b>                                                                                                                   | 985 (82.4)                    | 266 (77.3)              | 0.325 <sup>a</sup>        |
| SECTION B: Communication and Work Pace                                                                                                        | Independent Pharmacy<br>N (%) | Chain Pharmacy<br>N (%) | P value                   |
| <b>4. Communication Openness:</b>                                                                                                             |                               |                         |                           |
| B1 Staff ideas and suggestions are valued in this pharmacy                                                                                    | 232 (79.5)                    | 57 (66.3)               | <b>0.011 <sup>b</sup></b> |
| B5 Staff feel comfortable asking questions when they are unsure about something                                                               | 242 (82.9)                    | 67 (77.9)               | 0.294 <sup>b</sup>        |
| B10 It is easy for staff to speak up to their supervisor/manager about patient safety concerns in this pharmacy                               | 229 (78.4)                    | 66 (76.7)               | 0.741 <sup>b</sup>        |
| <b>Dimension positivity</b>                                                                                                                   | 703 (80.3)                    | 190 (73.6)              | 0.194 <sup>a</sup>        |
| <b>5. Patient Counseling:</b>                                                                                                                 |                               |                         |                           |
| B2 We encourage patients to talk to pharmacists about their medications                                                                       | 256 (87.7)                    | 73 (84.9)               | 0.499 <sup>a</sup>        |
| B7 Our pharmacists spend enough time talking to patients about how to use their medications                                                   | 242 (82.9)                    | 72 (83.7)               | 0.854 <sup>b</sup>        |
| B11 Our pharmacists tell patients important information about their new prescriptions                                                         | 249 (85.3)                    | 74 (86.0)               | 0.866 <sup>a</sup>        |
| <b>Dimension positivity</b>                                                                                                                   | 747 (85.3)                    | 219 (84.9)              | 0.126 <sup>a</sup>        |
| <b>6. Staffing, Work Pressure, and Pace</b>                                                                                                   |                               |                         |                           |
| B3 Staff take adequate breaks during their shifts                                                                                             | 193 (66.1)                    | 33 (38.4)               | <b>0.000 <sup>b</sup></b> |
| B9 We feel rushed when processing prescriptions (R)                                                                                           | 74 (25.3)                     | 25 (29.1)               | 0.490 <sup>b</sup>        |
| B12 We have enough staff to handle the workload                                                                                               | 231 (79.1)                    | 59 (68.6)               | <b>0.043 <sup>b</sup></b> |
| B16 Interruptions/distractions in this pharmacy (from phone calls, faxes, customers, etc.) make it difficult for staff to work accurately (R) | 71 (24.3)                     | 18 (20.9)               | 0.516 <sup>b</sup>        |
| <b>Dimension positivity</b>                                                                                                                   | 569 (42.9)                    | 135 (39.5)              | <b>0.018 <sup>a</sup></b> |
| <b>7. Communication About Prescriptions Across Shifts</b>                                                                                     |                               |                         |                           |
| B4 We have clear expectations about exchanging important prescription information across shifts                                               | 215 (73.6)                    | 57 (66.3)               | 0.182 <sup>b</sup>        |
| B6 We have standard procedures for communicating prescription information across shifts                                                       | 196 (67.1)                    | 59 (68.6)               | 0.797 <sup>b</sup>        |
| B14 The status of problematic prescriptions is well communicated across shifts                                                                | 228 (78.1)                    | 66 (76.7)               | 0.793 <sup>b</sup>        |
| <b>Dimension positivity</b>                                                                                                                   | 639 (72.9)                    | 182 (70.5)              | 0.124 <sup>a</sup>        |

Table S2. *cont.*

| SECTION B: Communication and Work Pace                                                                  | Independent Pharmacy<br>N (%) | Chain Pharmacy<br>N (%) | P value                  |
|---------------------------------------------------------------------------------------------------------|-------------------------------|-------------------------|--------------------------|
| <b>8. Communication About Mistakes:</b>                                                                 |                               |                         |                          |
| B8 Staff in this pharmacy discuss mistakes                                                              | 241 (82.5)                    | 67 (77.9)               | 0.332 <sup>b</sup>       |
| B13 When patient safety issues occur in this pharmacy, staff discuss them                               | 225 (77.1)                    | 67 (77.9)               | 0.868 <sup>b</sup>       |
| B15 In this pharmacy, we talk about ways to prevent mistakes from happening again                       | 239 (81.8)                    | 62 (72.1)               | <b>0.048<sup>b</sup></b> |
| Dimension positivity                                                                                    | 705 (80.5)                    | 196 (76.0)              | 0.523 <sup>a</sup>       |
| SECTION C: Patient Safety and Response to Mistakes                                                      | Independent Pharmacy<br>N (%) | Chain Pharmacy<br>N (%) | P value                  |
| <b>9. Response to Mistakes:</b>                                                                         |                               |                         |                          |
| C1 Staff are treated fairly when they make mistakes                                                     | 223 (76.4)                    | 49 (57.0)               | <b>0.000<sup>b</sup></b> |
| C4 This pharmacy helps staff learn from their mistakes rather than punishing them                       | 242 (82.9)                    | 56 (65.1)               | <b>0.000<sup>b</sup></b> |
| C7 We look at staff actions and the way we do things to understand why mistakes happen in this pharmacy | 240 (82.2)                    | 66 (76.7)               | 0.258 <sup>b</sup>       |
| C8 Staff feel like their mistakes are held against them (R)                                             | 184 (63.0)                    | 36 (41.9)               | <b>0.000<sup>b</sup></b> |
| Dimension positivity                                                                                    | 889 (76.0)                    | 207 (61.2)              | <b>0.001<sup>a</sup></b> |
| <b>10. Organizational Learning – Continuous Improvement</b>                                             |                               |                         |                          |
| C2 When a mistake happens, we try to figure out what problems in the work process led to the mistake    | 255 (87.3)                    | 60 (69.8)               | <b>0.000<sup>b</sup></b> |
| C5 When the same mistake keeps happening, we change the way we do things                                | 248 (84.9)                    | 62 (72.1)               | <b>0.006<sup>b</sup></b> |
| C10 Mistakes have led to positive changes in this pharmacy                                              | 223 (76.4)                    | 55 (64.0)               | <b>0.022<sup>b</sup></b> |
| Dimension positivity                                                                                    | 726 (82.9)                    | 177 (68.6)              | <b>0.001<sup>a</sup></b> |
| <b>11. Overall Perceptions of Patient Safety:</b>                                                       |                               |                         |                          |
| C3 This pharmacy places more emphasis on sales than on patient safety (R)                               | 204 (69.9)                    | 49 (57.0)               | <b>0.026<sup>b</sup></b> |
| C6 This pharmacy is good at preventing mistakes                                                         | 252 (86.3)                    | 66 (76.7)               | <b>0.033<sup>b</sup></b> |
| C9 The way we do things in this pharmacy reflects a strong focus on patient safety                      | 256 (87.7)                    | 63 (73.3)               | <b>0.001<sup>b</sup></b> |
| Dimension positivity                                                                                    | 712 (81.3)                    | 178 (69.0)              | <b>0.006<sup>a</sup></b> |

(R): Negatively worded items were reversed coded; P-values of <sup>a</sup> Fisher's exact test and <sup>b</sup> Pearson chi-square test (numbers in bold are significant numbers generated from the statistical tests).
